# Supplementary material for: Prefoldin 5 is a microtubule-associated protein that suppresses Tau aggregation and neurotoxicity
Source: eLife journal article supplement (doi:10.7554/elife.104691), 2024-12-23
Supplement: fig2-data2 [file Figure 2-Source data 2.pdf › Figure 2-Source data 2/Figure 2-Source data 2.pdf]

### Ace-tubulin

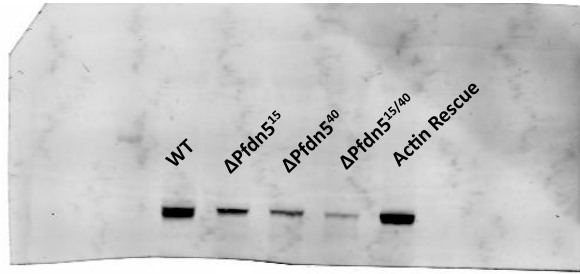

### $\alpha$ -Tubulin

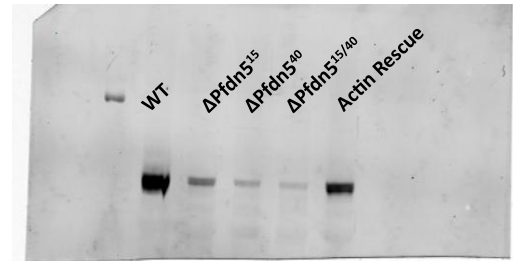

### Ran

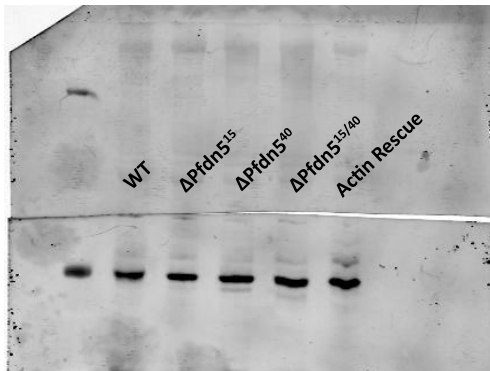

### $\beta$ -actin

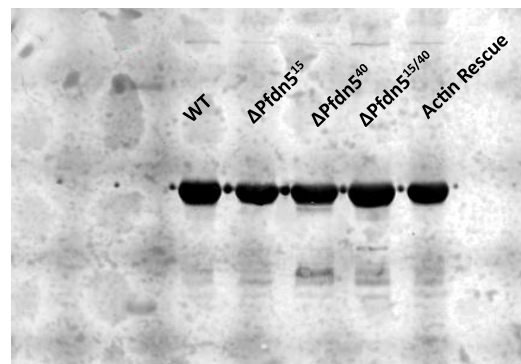

### $\beta$ -Tubulin

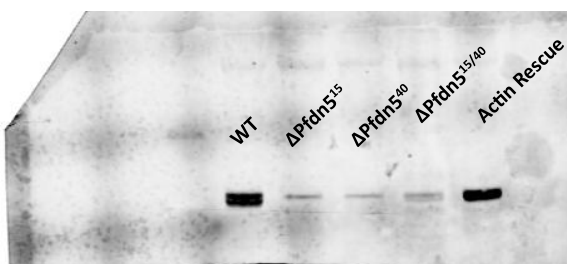

**Figure 2-source data 2.** Original membranes corresponding to Figure 2, panel G.
