# Supplementary material for: Prefoldin 5 is a microtubule-associated protein that suppresses Tau aggregation and neurotoxicity
Source: eLife journal article supplement (doi:10.7554/elife.104691), 2024-12-23
Supplement: fig3-data2 [file Figure 3-Source data 2.pdf › Figure 3-Source data 2/Figure 3-Source data 2.pdf]

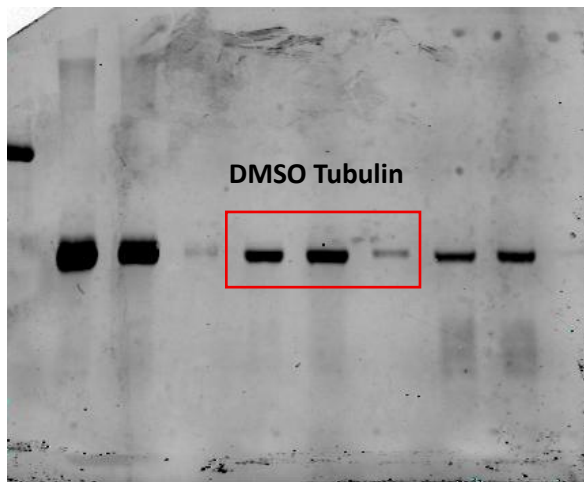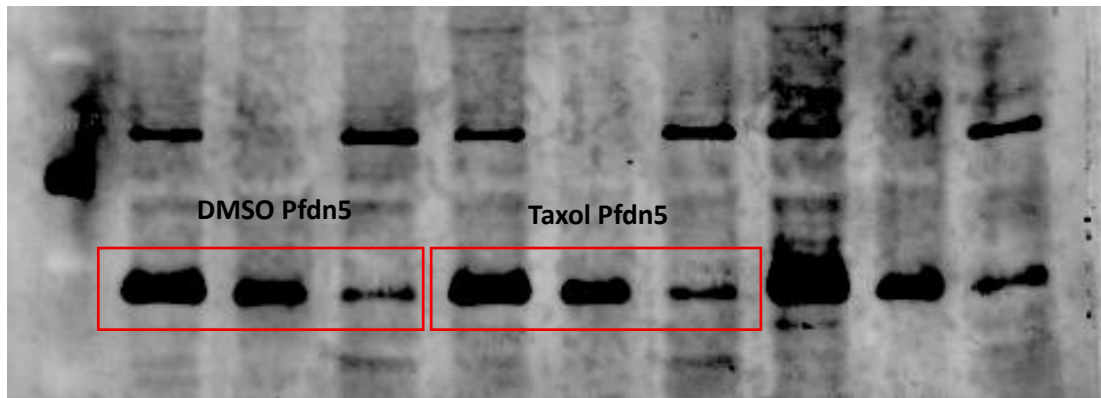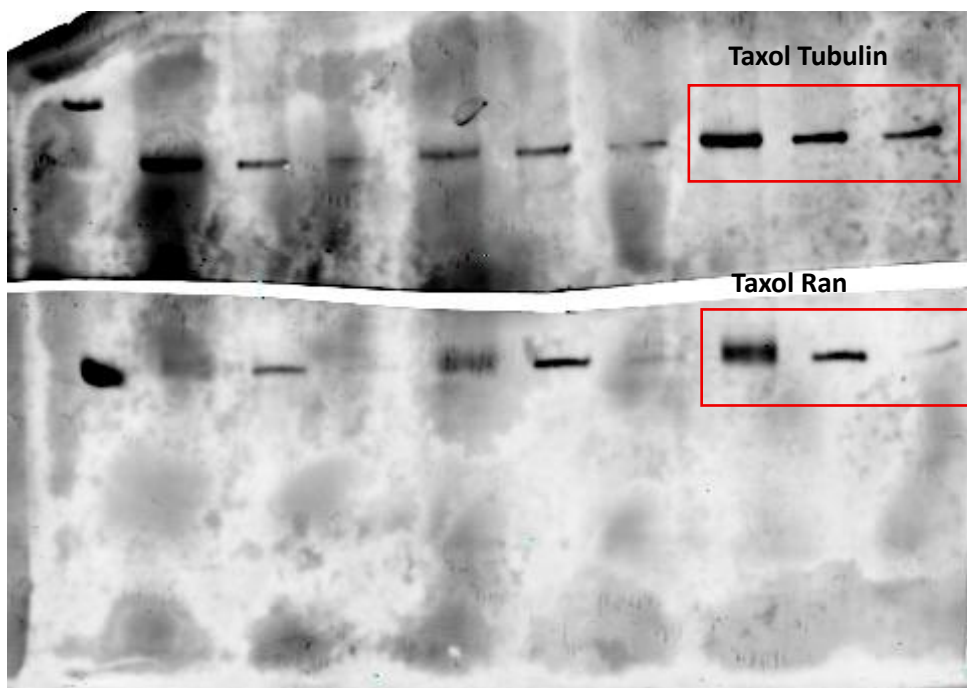

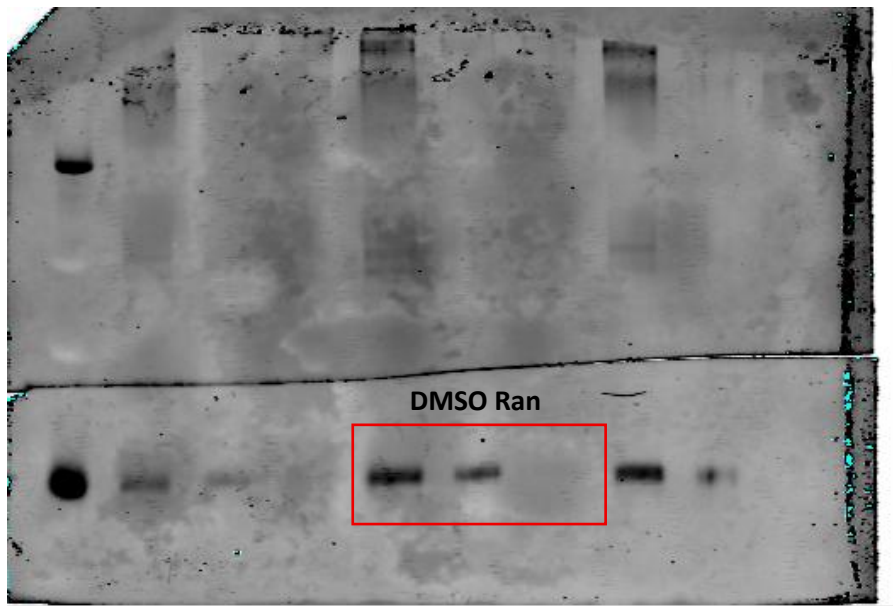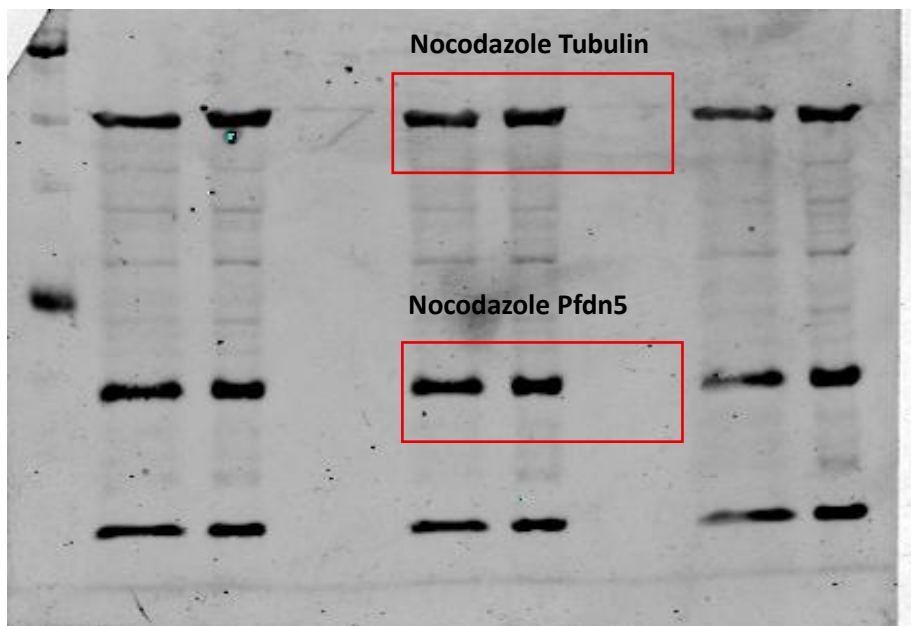

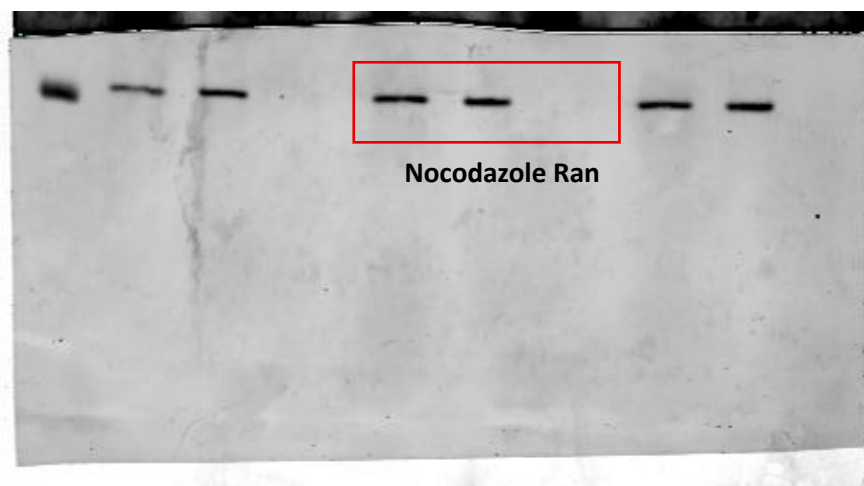

**Figure 3-source data 2.** Original membranes corresponding to Figure 3, panel F. Relevant bands are labelled and marked in red boxes. Remaining or unmarked bands are of the irrelevant samples.
