# Supplementary material for: Prefoldin 5 is a microtubule-associated protein that suppresses Tau aggregation and neurotoxicity
Source: eLife journal article supplement (doi:10.7554/elife.104691), 2024-12-23
Supplement: fig3-figsupp1-data2 [file Figure 3-figure supplement 1-source data 2.pdf › Figure 3-figure supplement 1-source data 2/Figure 3-figure supplement 1-source data 2.pdf]

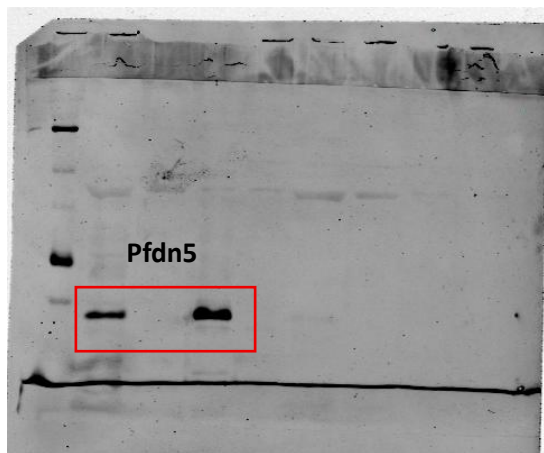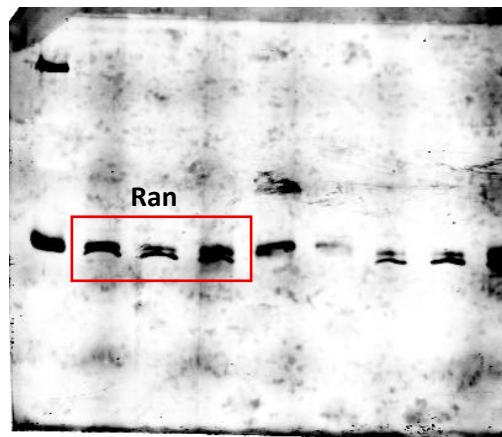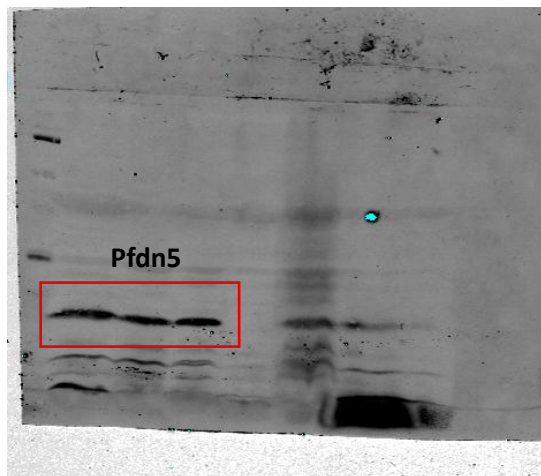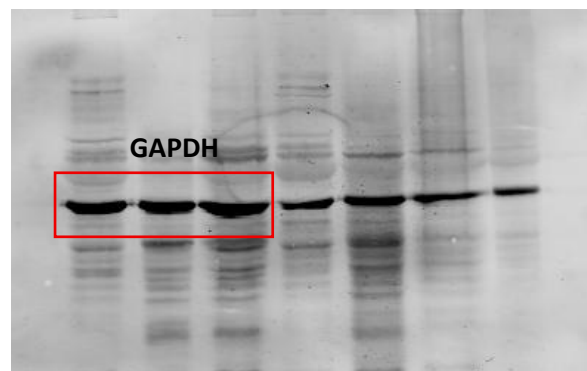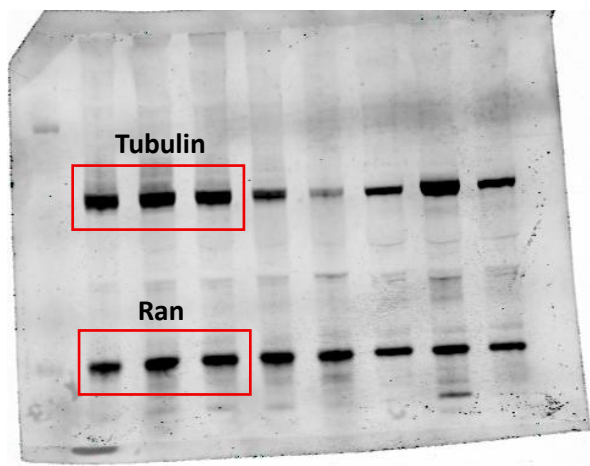

**Figure 3-Figure supplement 1-source data 2.** Original membranes corresponding to Figure 3-Figure supplement 1, panel A and F. Relevant bands are labelled and marked in red boxes. Remaining or unmarked bands are of the irrelevant samples. Red-marked boxes of the first two blots indicate the following genotypes (lane 1: Control, lane 2:  $\Delta$ Pfdn5<sup>15/40</sup>, Lane 3: Actin Rescue). Red-marked boxes of the last three blots indicate the following genotypes (lane 1: Control, lane 2:  $\Delta$ Pfdn5<sup>15/+</sup>, Lane 3:  $\Delta$ Pfdn5<sup>40/+</sup>).
