# Supplementary material for: Prefoldin 5 is a microtubule-associated protein that suppresses Tau aggregation and neurotoxicity
Source: eLife journal article supplement (doi:10.7554/elife.104691), 2024-12-23
Supplement: fig5-figsupp2-data2 [file Figure 5-figure supplement 2-source data 2.pdf › Figure 5-figure supplement 2-source data 2/Figure 5-figure supplement 2-source data 2.pdf]

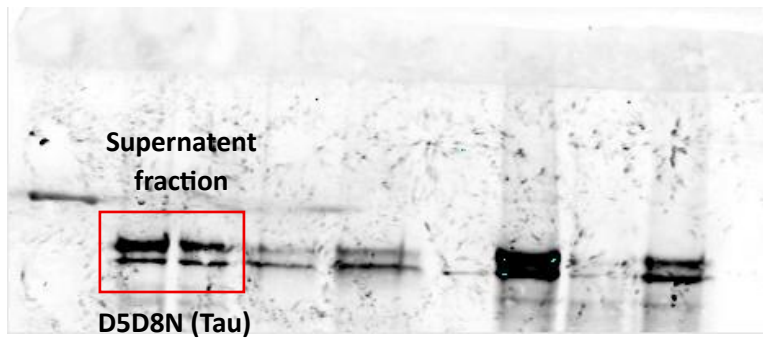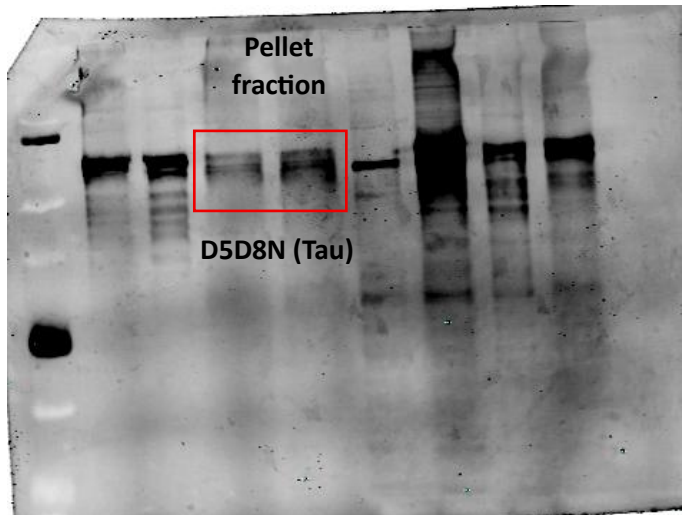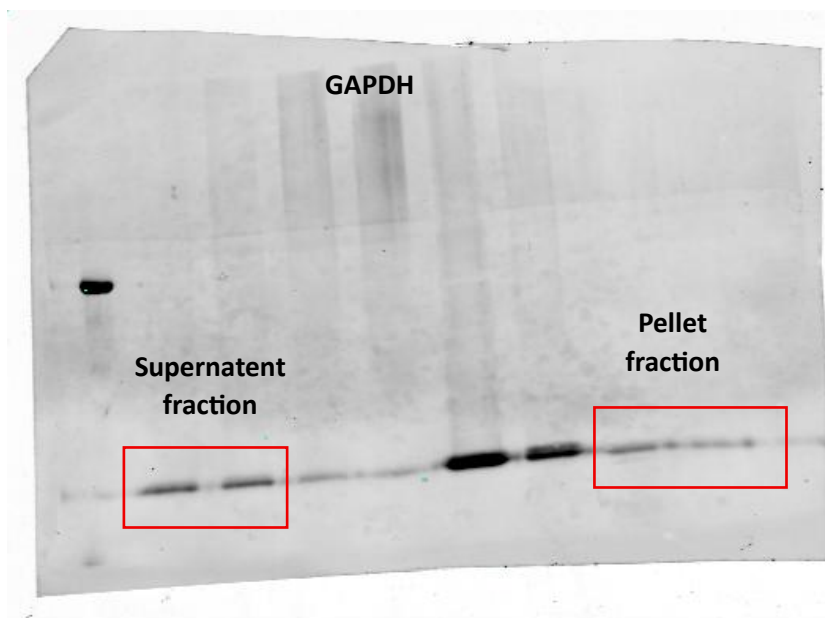

**Figure 5-Figure supplement 2-source data 2.** Original membranes corresponding to Figure 5-Figure supplement 2, panel A. Relevant bands are labelled and marked in red boxes.

Remaining or unmarked bands are of the irrelevant samples. Red-marked boxes indicate the following genotypes (lane 1:  $\text{Elav>UAS-hTau}^{\text{V337M}}$ , lane 2:  $\text{Elav>UAS-hTau}^{\text{V337M}}; \Delta\text{Pfdn5}^{15/40}$ ).
