# Supplementary material for: Prefoldin 5 is a microtubule-associated protein that suppresses Tau aggregation and neurotoxicity
Source: eLife journal article supplement (doi:10.7554/elife.104691), 2024-12-23
Supplement: fig6-data2 [file Figure 6-Source data 2.pdf › Figure 6-Source data 2/Figure 6-Source data 2.pdf]

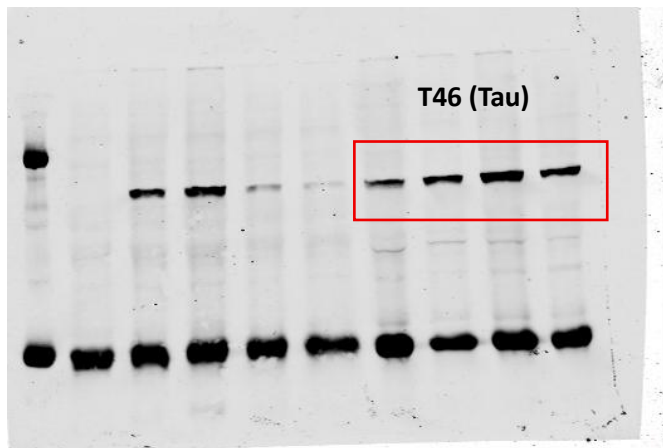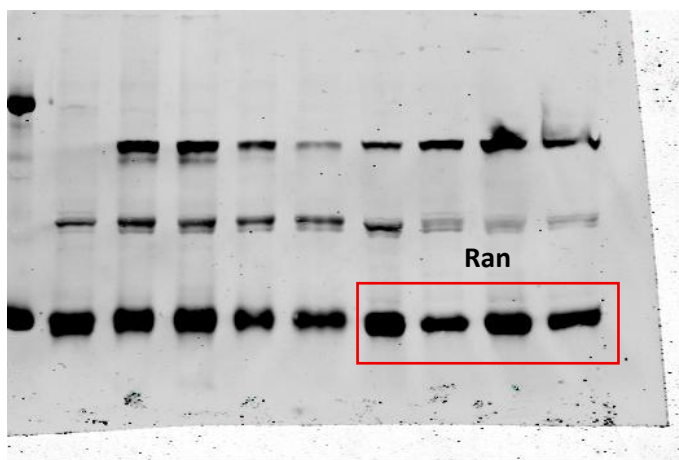

**Figure 6-source data 2.** Original membranes corresponding to Figure 6, panel O. Relevant bands are labelled and marked in red boxes. Remaining or unmarked bands are of the irrelevant samples. Red-marked boxes indicate the following genotypes (lane 1: Elav>UAS-hTau<sup>V337M</sup>, lane 2: Elav>UAS-hTau<sup>V337M</sup>; UAS-GFP, Lane 3: Elav>UAS-hTau<sup>V337M</sup>; UAS-Pfdn5, Lane 4: Elav>UAS-hTau<sup>V337M</sup>; UAS-Pfdn6).
