# Supplementary material for: Prefoldin 5 is a microtubule-associated protein that suppresses Tau aggregation and neurotoxicity
Source: eLife journal article supplement (doi:10.7554/elife.104691), 2024-12-23
Supplement: fig8-data2 [file Figure 8-Source data 2.pdf › Figure 8-Source data 2/Figure 8-Source data 2.pdf]

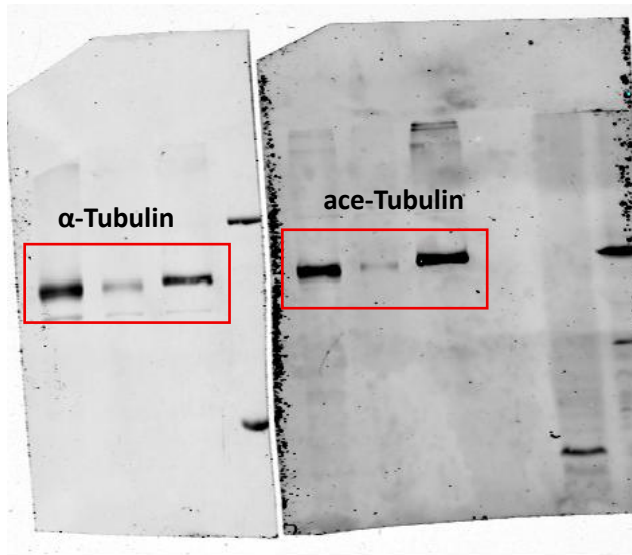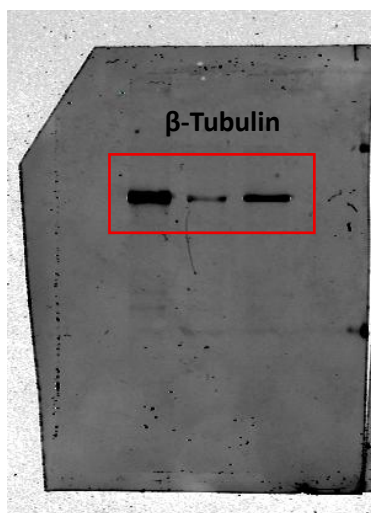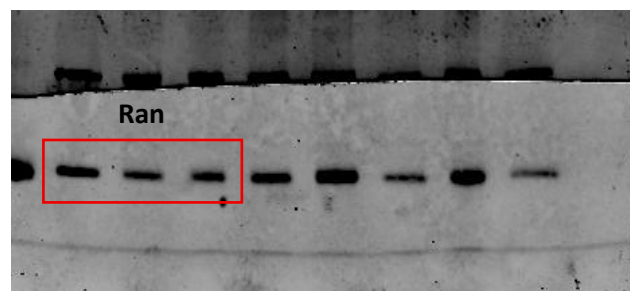

**Figure 8-source data 2.** Original membranes corresponding to Figure 8, panel A. Relevant bands are labelled and marked in red boxes. Remaining or unmarked bands are of the irrelevant samples. Red-marked boxes indicate the following genotypes (lane 1: Control, lane 2:  $\Delta Pfdn5^{15/40}$ , Lane 3:  $Elav>UAS-\alpha; \Delta Pfdn5^{15/40}$ ).
