# Supplementary material for: Prefoldin 5 is a microtubule-associated protein that suppresses Tau aggregation and neurotoxicity
Source: eLife journal article supplement (doi:10.7554/elife.104691), 2024-12-23
Supplement: fig8-figsupp1-data2 [file Figure 8-figure supplement 1-source data 2.pdf › Figure 8-figure supplement 1-source data 2/Figure 8-figure supplement 1-source data 2.pdf]

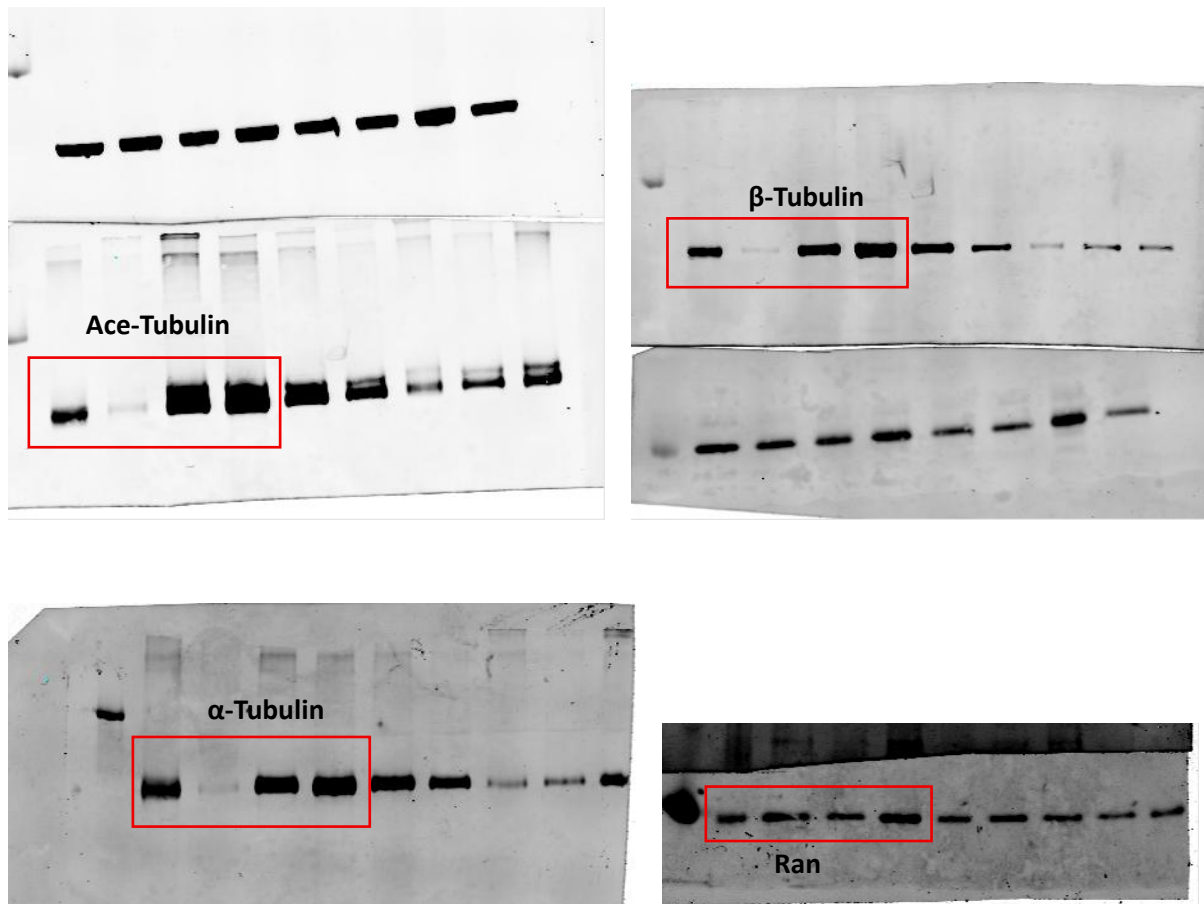

**Figure 8-Figure supplement 1-source data 2.** Original membranes corresponding to Figure 8-Figure supplement 1, panel A. Relevant bands are labelled and marked in red boxes. Remaining or unmarked bands are of the irrelevant samples. Red-marked boxes indicate the following genotypes (lane 1: Control, lane 2:  $\Delta$ Pfdn5<sup>15/40</sup>, lane 3: Elav>UAS-α-Tubulin;  $\Delta$ Pfdn5<sup>15/40</sup>, lane 4: Elav>UAS-Pfdn5;  $\Delta$ Pfdn5<sup>15/40</sup>). Blots are cut and staining with the labelled antibodies.
