# Supplementary material for: Prefoldin 5 is a microtubule-associated protein that suppresses Tau aggregation and neurotoxicity
Source: eLife. 2026 Jan 14;13:RP104691. doi: 10.7554/eLife.104691 (PMC12803513; doi:10.7554/eLife.104691)
Supplement: Figure 1—figure supplement 1—source data 1. [file elife-104691-fig1-figsupp1-data1.xlsx]

## Sheet: AH
Tau	UAS-GFP	BL36070	KK108585	GD18738	GD47745	BL44485	KK107020	GD19202	GD41748	GD26465	GD39699	GD16432	KK108568	BL57382	KK109817	BL67920	GD2714	KK110270	BL28594	BL31290	KK100857	KK102493	KK106510	BL42626	BL42639	BL39017	BL32978(DNAJ1)	BL42820	BL57854	BL37507	BL43205	BL58200	BL80386	BL35663
54.9941	41.1252	88.6086	55.2074	70.5483	46.1624	68.1198	56.6022	86.8494	90.3829	59.2191	80.4922	54.4549	53.5833	71.3058	55.4591	79.2295	55.8104	66.2851	60.9469	66.9029	16.5802	34.4961	24.94	18.8886	19.0764	26.9445	27.9186	24.18	21.1645	24.5813	15.8694	5.9429	28.4917	8.9
34.8107	47.8286	96.0141	61.0756	77.6343	64.235	95.3632	51.8318	92.0127	93.0465	74.4385	63.226	52.997	54.105	86.6484	54.9956	60.8289	58.0897	73.7868	72.0497	62.5618	30.0794	33.2471	17.2155	15.4857	11.0353	29.539	30.9459	28.7332	23.9244	18.3968	22.9813	12.6859	25.9553	3.45
37.249	42.0045	94.2047	51.8989	58.5069	59.5414	92.9434	60.6139	88.2253	88.3521	74.7825	58.9961	57.1889	59.4372	57.2451	50.3421	78.1411	84.4132	65.5054	62.8864	71.2667	34.1647	14.6304	21.9962	14.5252	10.3919	28.0821	33.6047	15.5864	27.9716	24.9352	22.1839	14.9026	26.5593	2.098
40.7894	52.297	93.9812	53.9603	67.5729	47.7885	65.13	71.6093	95.2796	90.6983	53.2877	73.8525	61.6067	90.4512	54.8365	47.1436	67.9072	69.313	74.1531	62.4299	47.5256	33.2831	15.5924	22.9411	10.7701	18.2376	19.096	30.4556	12.8391	28.0245	20.3799	23.4301	16.65		1.098
40.5963	48.5015	93.0026	82.8366	70.1751	63.1495	56.5862	62.2836	83.9842		86.6627	96.7916	52.1941	60.6081	57.3079	63.1635	57.6543	56.7656	71.4464	68.3037	57.0927	26.2218	16.6478	20.847	11.9888		32.9247	35.3584	24.5659	29.0995	28.5066		9.71451
						85.753						53.5486	71.9643				66.0224		60.4035	53.0802				11.3035			30.0345			18.5557
																			71.9255
