# Supplementary material for: Prefoldin 5 is a microtubule-associated protein that suppresses Tau aggregation and neurotoxicity
Source: eLife. 2026 Jan 14;13:RP104691. doi: 10.7554/eLife.104691 (PMC12803513; doi:10.7554/eLife.104691)
Supplement: Figure 1—figure supplement 2—source data 1. [file elife-104691-fig1-figsupp2-data1.xlsx]

## Sheet: Figure 1-figure supplement 2
WT	BL77412- pfdn4	WT	KK100796 pfdn5	BL67815 Pfdn5	GD29812 Pfdn5	WT	BL65365 Pfdn6	GD24304 Pfdn6	WT	BL34537 tbce
1	0.50698	1	0.31405	0.565796	0.410495	1	0.555944	0.408652	1	0.67349
1	0.624165	1	0.307146	0.494485	0.380486	1	0.421648	0.528449	1	0.354978
1	0.547147	1	0.31787	0.573156	0.512571	1	0.405213	0.407343	1	0.470923
