# Supplementary material for: Prefoldin 5 is a microtubule-associated protein that suppresses Tau aggregation and neurotoxicity
Source: eLife. 2026 Jan 14;13:RP104691. doi: 10.7554/eLife.104691 (PMC12803513; doi:10.7554/eLife.104691)
Supplement: Figure 1—source data 1. [file elife-104691-fig1-data1.xlsx]

## Sheet: Figure 1M
GMR>Tau	GMR Tau GFP	GMR Tau Pfdn4	GMR Tau Pfdn5 BL67815	GMR Tau Pfdn5 KK100796	Pfdn5 GD29812	Pfdn6 BL65365	Pfdn6 GD 34204	Pfdn6 KK101541	TBCE BL34537	CCT5 BL41818	CCT7 BL34931
44.8332	46.9114	70.2011	65.6906	94.7234	45.413	79.6063	99	74.1518	54.3887	63.4133	54.0419
43.4669	41.9552	73.62	50.0821	90.869	49.6288	80.9461	98	80.0719	79.3261	62.0104	62.601
54.9941	38.6099	58.1973	56.0594	90.0388	60.0796	73.4904	97	60.7177	77.4194	56.9978	62.6849
34.8107	42.4142	50.3229	67.6389	86.0392	67.3908	78.7213	99	44.0442	66.2856	62.2828	82.1835
37.249	44.433	61.7635	68.3313	88.3535	88.9523	51.2957	99.6794	64.1062	57.5586	78.2596	52.2336
40.7894	43.7185	63.9375		91.5494	72.9221	60.8346	97.98	48.9858	60.6316	64.8683	56.2512
40.5963	48.7921	67.0182		68.9957	71.4435	71.7509	99.3456		61.4905	62.7191
46.1738	43.3918			57.7756	59.6991
43.588	51.6984			81.8237
39.9674	51.3679			86.3814
43.6256	62.0704			82.4284
	45.243			98.3181
				88.5199
