# Supplementary material for: Prefoldin 5 is a microtubule-associated protein that suppresses Tau aggregation and neurotoxicity
Source: eLife. 2026 Jan 14;13:RP104691. doi: 10.7554/eLife.104691 (PMC12803513; doi:10.7554/eLife.104691)
Supplement: Figure 2—figure supplement 1—source data 1. [file elife-104691-fig2-figsupp1-data1.xlsx]

## Sheet: F
w1118	∆Pfdn515	∆Pfdn540	∆Pfdn515/40
1	7	4	3
1	5	8	10
0	4	4	6
2	8	10	14
0	10	8	18
5	3	7	9
1	5	8	7
2	6	5	5
1	6	5	3
1	8	4	4
6	5	4	2
7	10	14	4
5	11	8	1
1	9	6	10
3	12	7	11
6	3	4	8

## Sheet: G
w1118	∆Pfdn515	∆Pfdn540	∆Pfdn515/40
2.6778	5.249	5.8938	3.3836
5.1194	4.1542	4.9818	5.4016
2.6628	4.5164	4.055	4.326
1.9686	3.5664	4.6998	5.31
3.189	5.1306	5.3674	4.0244
3.2846	5.2146	5.5732	3.3758
4.8332	4.2458	4.917	4.0856
3.9368	4.8446	4.8942	5.642
5.5504	4.7302	5.6382	5.3444
6.0768	4.6198	5.684	6.756
6.8968	5.1346	5.703	7.3204
4.757	4.566	4.5774	6.008
3.765	4.4176	3.6432	4.6464
3.8604	6.9772	4.0092	4.5278
4.2458	6.7596	4.1618	5.6952
4.5164	4.4022	6.6302	5.6724

## Sheet: H
w1118	∆Pfdn515	∆Pfdn540	∆Pfdn515/40
4	2	3	2
3	2	3	2
3	3	2	4
4	2	3	2
2	2	2	1
4	3	4	2
4	3	3	1
2	2	2	4
4	2	9	1
2	3	2	3
3	3	3	3
3	3	3	2
4	2	3	3
4	2	2	5
2	4	2	4
2	4	3	2

## Sheet: I
w1118	∆Pfdn515	∆Pfdn540	∆Pfdn515/40
36	47	35	33
29	43	30	41
43	28	29	34
42	32	46	40
27	29	36	30
41	38	45	42
32	28	46	31
21	25	31	34
23	32	52	31
42	52	23	38
40	38	42	28
34	44	47	56
41	42	54	51
41	26	37	54
32	37	41	36
40	36	30	35
