# Supplementary material for: Prefoldin 5 is a microtubule-associated protein that suppresses Tau aggregation and neurotoxicity
Source: eLife. 2026 Jan 14;13:RP104691. doi: 10.7554/eLife.104691 (PMC12803513; doi:10.7554/eLife.104691)
Supplement: Figure 2—figure supplement 2—source data 1. [file elife-104691-fig2-figsupp2-data1.xlsx]

## Sheet: D
w1118	∆Pfdn515/40	Mef2-Gal4 Rescue
693.83	240.875	189.751
733.273	118.055	179.94
780.336	141.887	246.408
800.296	150.5	192.662
555.02	149.882	178.469
727.482	142.3	183.688
700.291	197.304	149.054
953.451	148.254	562.433
861.611	149.926	391.979
402.579	135.057	333.539
608.32	84.245	682.76
554.948	130.295	409.589
120.783	131.967	758.953
148.623	129.007	616.907
113.776	121.921	178.962
127.506	137.173	318.256
130.086	103.635	1143.83

## Sheet: H
w1118	∆Pfdn515/40	Elav-Gal4 Rescue
0.48	0.31	0.48
0.64	0.32	0.52
0.67	0.34	0.58
0.53	0.47	0.47
0.62	0.45	0.53
0.52	0.42	0.6
0.47	0.28	0.45
0.36	0.32	0.58
