# Supplementary material for: Prefoldin 5 is a microtubule-associated protein that suppresses Tau aggregation and neurotoxicity
Source: eLife. 2026 Jan 14;13:RP104691. doi: 10.7554/eLife.104691 (PMC12803513; doi:10.7554/eLife.104691)
Supplement: Figure 2—source data 1. [file elife-104691-fig2-data1.xlsx]

## Sheet: Figure 2F
w1118	∆Pfdn515/40	Elav-Gal4 Rescue
22.2222	13.7931	15.625
22.7273	19.4444	26.9231
31.0345	3.44828	20
29.6296	20	32.2581
15.7895	13.0435	23.5294
30.303	3.44828	31.8182
30.7692	4.16667	27.5
15.7895	4.16667	25.9259
3.33333	0	20
10	8.69565	30.7692
17.2414	10.5263	41.1765
7.14286	7.40741	50
25.8065	0	26.6667
17.8571	0	16.6667
14.2857	3.84615	28
25.8065	11.5385	21.4286

## Sheet: Figure 2H
w1118	∆Pfdn515	∆Pfdn540	∆Pfdn515/40	actin5C-Gal4 Rescue
1	0.4812	0.401691	0.38787	1.05298
1	0.589	0.533717	0.494103	0.821382
1	0.42973	0.538681	0.69699	1.27945
1	0.378338	0.352651	0.0174571	0.748225

## Sheet: Figure 2I
w1118	∆Pfdn515	∆Pfdn540	∆Pfdn515/40	actin5C-Gal4 Rescue
1	0.230429	0.137787	0.0758929	0.716836
1	0.231294	0.135373	0.0650332	0.934572
1	0.347791	0.205562	0.183206	0.903312

## Sheet: Figure 2J
w1118	∆Pfdn515	∆Pfdn540	∆Pfdn515/40	actin5C-Gal4 Rescue
1	0.415428	0.311439	0.126568	0.793169
1	0.588803	0.452256	0.415736	1.1434
1	0.564123	0.419381	0.380669	1.15201
