# Supplementary material for: Prefoldin 5 is a microtubule-associated protein that suppresses Tau aggregation and neurotoxicity
Source: eLife. 2026 Jan 14;13:RP104691. doi: 10.7554/eLife.104691 (PMC12803513; doi:10.7554/eLife.104691)
Supplement: Figure 3—figure supplement 1—source data 1. [file elife-104691-fig3-figsupp1-data1.xlsx]

## Sheet: Figure S5E
w1118	∆Pfdn515/40	actin5C-Gal4 Rescue
0.578987	0.268092	0.347513
0.430415	0.118702	0.43073
0.430556	0.257347	0.442587
0.443019	0.217717	0.403665
0.414885	0.258352	0.311753
0.513318	0.225531	0.39618
0.539358	0.210945	0.401354

## Sheet: Figure S5G
w1118	∆Pfdn515	∆Pfdn540
1	0.832025	0.951633
1	0.872504	0.995645
1	0.71928	0.708796

## Sheet: Figure S5H
w1118	∆Pfdn515	∆Pfdn540
1	0.747601	0.747465
1	0.977695	1.01804
1	0.8866	1.08139
