# Supplementary material for: Prefoldin 5 is a microtubule-associated protein that suppresses Tau aggregation and neurotoxicity
Source: eLife. 2026 Jan 14;13:RP104691. doi: 10.7554/eLife.104691 (PMC12803513; doi:10.7554/eLife.104691)
Supplement: Figure 3—source data 1. [file elife-104691-fig3-data1.xlsx]

## Sheet: Figure 3D
Pfdn5-Tub
0.66
0.57
0.7
0.54
0.557
0.557
0.69
0.6

## Sheet: Figure 3G
WT DMSO	WT Nocodazol	WT Taxol
8.15317	0.11458	29.805
0.113553	0.55542	25.1518
17.0113	0.49595	33.3577
3.42057	0.274855	28.5797
10.4612	0.658702	66.4607
