# Supplementary material for: Prefoldin 5 is a microtubule-associated protein that suppresses Tau aggregation and neurotoxicity
Source: eLife. 2026 Jan 14;13:RP104691. doi: 10.7554/eLife.104691 (PMC12803513; doi:10.7554/eLife.104691)
Supplement: Figure 4—figure supplement 1—source data 1. [file elife-104691-fig4-figsupp1-data1.xlsx]

## Sheet: D
w1118	∆Pfdn515/40	Elav-Gal4/+	Elav-Gal4>UAS-hTauR406W	Elav-Gal4>UAS-hTauR406W; ∆Pfdn515/40
31	45	28	30	80
29	53	29	34	81
21	27	27	32	45
31	34	23	21	48
40	37	25	32	39
32	41	24	39	78
24	25	28	43	81
42	31	37	50	52
34	38	30	38	60
34	43	25	36	42
42	35	19	34	55
39	24	35	41	75
18		30	24	52
		14	21	46
		18	30	34
			29

## Sheet: E
w1118	∆Pfdn515/40	Elav-Gal4/+	Elav-Gal4>UAS-hTauR406W	Elav-Gal4>UAS-hTauR406W; ∆Pfdn515/40
5.24267	6.21067	3.054	7.72467	1.34433
5.35067	4.089	5.69567	6.44267	2.69867
4.64533	10.037	4.68133	6.55033	2.405
4.21767	6.57667	4.24333	8.31167	2.73433
4.872	3.89333	4.01167	8.85267	2.04433
5.74233	5.04167	6.33933	7.51367	1.67867
5.03133	4.434	4.68633	4.93367	2.364
4.65033	7.06033	3.842	4.35167	1.931
6.355	6.72567	3.03833	8.42	2.477
5.026	7.586	5.809	4.65	1.32867
4.21233	4.331	10.1503	5.263	1.72
5.42267	10.8867	6.149	7.82267	1.97767
6.128	4.846	5.253	6.968	1.29267

## Sheet: J
Elav-Gal4/+	∆Pfdn515/40	Elav-Gal4>UAS-hTauV337M	Elav-Gal4>UAS-hTauV337M; ∆Pfdn515/40	Elav-Gal4>UAS-hTauV337M; UAS-Pfdn5; ∆Pfdn515/40
57.4802	44.7306	48.8171	25.304	61.0971
74.866	42.6757	62.2169	24.1757	60.4605
71.5597	49.7848	43.1185	30.808	69.026
68.6409	36.5229	50.942	42.97	71.0553
68.0014	47.8025	47.2952	23.1136	88.9806
66.1701	35.8005	40.5984	32.2519	91.5412
75.1107	46.654	57.547	29.4081	61.3152
52.1518	60.0345	45	25.7889	82.6087
42.1928	66.4109	53.2125	28.0987	48.2742
55.9166	58.759	43.8423	39.175	67.4041
52.5033	55.0812	41.5072	23.7382	76.0728
66.314	47.5055	46.1195	46.9565	77.7888
61.2967	36.4334	53.4991	34.5922	41.5718
58.3487			35.6711	67.9723
