# Supplementary material for: Prefoldin 5 is a microtubule-associated protein that suppresses Tau aggregation and neurotoxicity
Source: eLife. 2026 Jan 14;13:RP104691. doi: 10.7554/eLife.104691 (PMC12803513; doi:10.7554/eLife.104691)
Supplement: Figure 4—source data 1. [file elife-104691-fig4-data1.xlsx]

## Sheet: Figure 4I
w1118	∆Pfdn515/40	Elav-Gal4 Rescue	Mef2-Gal4 Rescue	Elav-Gal4/+	Elav-Gal4>UAS-hTauV337M	Elav-Gal4>UAS-hTauV337M; ∆Pfdn515/40	Elav-Gal4>UAS-hTauV337M; UAS-Pfdn5; ∆Pfdn515/40
36	33	29	38	36	49	80	40
29	41	39	32	26	43	81	44
43	34	25	37	41	44	45	36
42	40	41	34	28	41	48	38
27	30	28	40	24	25	39	40
41	42	31	43	29	30	78	25
32	31	38	55	23	18	81	35
21	34	34	55	23	43	52	33
23	31	26	24	41	42	60	33
42	38	34	37	26	48	42	34
40	28	29	37	29	34	55	30
34	56	29	34	26	28	75	21
41	51	30	29	28	48	52	29
41	54	36	37	23	40	53
32	36	33	44	23	25	82
40	35	29		24	18	53
						48

## Sheet: Figure 4J
w1118	∆Pfdn515/40	Elav-Gal4 Rescue	Mef2-Gal4 Rescue	Elav-Gal4/+	Elav-Gal4>UAS-hTauV337M	Elav-Gal4>UAS-hTauV337M; ∆Pfdn515/40	Elav-Gal4>UAS-hTauV337M; UAS-Pfdn5; ∆Pfdn515/40
1	15	5	18	3	7	43	5
2	16	5	11	2	15	30	5
5	17	7	18	0	13	18	6
5	24	7	16	2	15	54	3
4	11	8	18	2	10	22	7
3	20	3	19	1	11	43	1
3	13	0	20	4	9	33	3
2	18	2	19	1	14	34	7
0	13	0	12	3	16	39	2
2	13	1	15	2	19	20	5
0	18	3	11	1	20	31	2
2	22	2	12	0	10	20	2
0	28	2	18	4	17		4
2	26	1	16	5	20
1	15	1	11	3	12
4	23	0			17

## Sheet: Figure 4K
w1118	∆Pfdn515/40	Elav-Gal4 Rescue	Mef2-Gal4 Rescue	Elav-Gal4/+	Elav-Gal4>UAS-hTauV337M	Elav-Gal4>UAS-hTauV337M; ∆Pfdn515/40	Elav-Gal4>UAS-hTauV337M; UAS-Pfdn5; ∆Pfdn515/40
4.64761	3.3836	6.7542	4.6502	3.054	8.46633	1.15867	6.836
4.78373	5.4016	4.658	5.31	5.69567	6.98033	1.80767	6.7596
5.56639	4.326	6.4964	5.5764	4.68133	7.68333	0.973667	7.656
5.5568	5.31	6.0846	5.661	4.24333	5.68533	1.67367	7.2098
4.36192	4.0244	5.3024	5.2798	4.01167	3.39367	4.09933	6.935
5.50638	3.3758	5.6724	5.428	6.33933	4.583	2.055	4.1314
5.77143	4.0856	4.0854	5.7832	4.68633	8.58	1.174	5.3596
5.61426	5.642	4.9476	4.8562	3.842	4.671	2.03933	6.2902
5.42674	5.3444	5.5504	5.0184	3.03833	6.66367	2.405	6.363
8.33375	6.756	6.79	6.4578	5.809	8.276	3.58433	5.642
5.72957	7.3204	3.7776	6.4926	4.161	7.10167	3.17733	4.627
5.94343	6.008	5.9772	7.0076	6.2	6.54033	1.87933	7.1488
5.78217	4.6464	5.9394	5.7322	5.732	8.415	2.879	6.729
7.93046	4.5278	6.2256	6.8588	10.1503	4.29	2.395
4.5164	5.6952	7.164	6.8436	6.149	4.671	2.72933
	5.6724	4.9326		5.253		2.72933
						2.122
