# Supplementary material for: Prefoldin 5 is a microtubule-associated protein that suppresses Tau aggregation and neurotoxicity
Source: eLife. 2026 Jan 14;13:RP104691. doi: 10.7554/eLife.104691 (PMC12803513; doi:10.7554/eLife.104691)
Supplement: Figure 5—figure supplement 1—source data 1. [file elife-104691-fig5-figsupp1-data1.xlsx]

## Sheet: F
Elav-Gal4>UAS-hTauV337M	Elav-Gal4>UAS-hTauV337M; ∆Pfdn515/40
0.001189	0.015163
0.002236	0.102395
0	0.207802
0.003786	0.017413
0	0.022916
0	0.012408
0	0.045594
0.004029	0.016523
0	0.04727
0.001217	0.011909
0.001342	0.02471
0.010539	0.023564
0	0.022445
0	0.006497
0	0.004773
0	0.017942
0	0.037644
0	0.014047
0.004186	0.002696
0	0.02659
0.002037	0.008644
0	0.006082
0	0.117909
0	0.099155
0	0.029003
0	0.024922
0	0.005876
0	0.003027
0.014464	0.021828
0.008993	0.027086
0	0.026366
0	0.009759
0	0.039692
0.00276	0.022309
0.01487	0.030096
0	0.019044
0
0.00177
0.003814
0.010881
0.004968
0.003146
0
0
0
0
0

## Sheet: I
Elav-Gal4>UAS-hTauWT	Elav-Gal4>UAS-hTauWT; ∆Pfdn515/40
0	17
1	13
0	11
0	20
0	14
0	15
0	15
