# Supplementary material for: Prefoldin 5 is a microtubule-associated protein that suppresses Tau aggregation and neurotoxicity
Source: eLife. 2026 Jan 14;13:RP104691. doi: 10.7554/eLife.104691 (PMC12803513; doi:10.7554/eLife.104691)
Supplement: Figure 5—figure supplement 2—source data 1. [file elife-104691-fig5-figsupp2-data1.xlsx]

## Sheet: B
Elav-Gal4>UAS-hTauV337M	Elav-Gal4>UAS-hTauV337M; ∆Pfdn515/40
1	0.852335
1	0.388553
1	0.311767

## Sheet: C
Elav-Gal4>UAS-hTauV337M	Elav-Gal4>UAS-hTauV337M; ∆Pfdn515/40
1	1.19025
1	1.29514
1	1.26498

## Sheet: L
Elav-Gal4>UAS-hTauV337M	Elav-Gal4>UAS-hTauV337M; ∆Pfdn515/40	1% HEX Elav-Gal4>UAS-hTauV337M	1% HEX Elav-Gal4>UAS-hTauV337M; ∆Pfdn515/40	5% HEX Elav-Gal4>UAS-hTauV337M	5% HEX Elav-Gal4>UAS-hTauV337M; ∆Pfdn515/40
0	3.57717	0.520635	2.78221	0.225787	3.12879
0	1.95107	0.225603	3.02852	0	2.80704
0	1.62324	0.216931	1.5529	0	3.80231
0.854951	1.86993	0.595019	0.976746	0.388191	2.44253
0.215397	1.68792	0	1.71553	0	1.78835
0.50866	4.07881	0.683855	3.53659	0.10987	4.89864
0	1.5644	0	1.48988	0.0664334	3.33644
0	1.19385	0.0734542	1.91526	0.260831	3.31174
3.49127	1.38783	0.387055	2.76521	0.170474	1.15152
0	1.80633	0.132705	2.32521	0.324771	2.7512
0	2.5671	0.299142	2.1829	0.244176	2.22322
0	1.33764	0	1.55969	0	3.89893
0.506229	7.55847	0	0.48604	0.177122	2.60645
0.237047	6.60546	0	2.04447	0.206857	2.16508
0	2.79307	0.513196	1.63607	0	1.29223
0	1.13115	0	2.95104	0	1.95333
0	5.84478	0.0866057	2.37141	0	2.92269
0.204329	3.88963	0.24483	1.26365	0	1.86768
1.12442	7.55847	0	2.78302	0.147789	1.21477
0	6.60546	0	3.73319	0.148371	2.52505
0	2.79307	0.580836	1.57901	0.0740741	2.04335
0	1.13115	0.278657	3.77608	0	0.913296
0	5.84478	0.21946	4.22983	0.1366	0.726249
1.02877	3.88963	0.276414	4.26997	0.107358	2.92706
0.159841		0.19485	2.23357	0.277129	3.41149
0		0.278245	2.73155	0.236513	1.46459
0.110923		0	4.78105	0	1.55872
0		0		0	2.86234
0		0		1.04188	0.927984
0		0.427681		0.506586	3.19114
				0	1.37745
				0	2.90208
