# Supplementary material for: Prefoldin 5 is a microtubule-associated protein that suppresses Tau aggregation and neurotoxicity
Source: eLife. 2026 Jan 14;13:RP104691. doi: 10.7554/eLife.104691 (PMC12803513; doi:10.7554/eLife.104691)
Supplement: Figure 5—figure supplement 3—source data 1. [file elife-104691-fig5-figsupp3-data1.xlsx]

## Sheet: J
Elav-Gal4>UAS-hTauV337M		Elav-Gal4>UAS-hTauV337M; ∆Pfdn515/40
without Licl	Licl	without Licl	Licl
0	0	23	24
1	1	16	19
0	3	15	16
2	0	14	19
0	0	15	22
1	0	22	17

## Sheet: E
	total punctae							p-Tau punctae							colocalised punctae
Elav-Gal4>UAS-hTauWT; ∆Pfdn515/40	25	31	21	16	14	15	15	5	6	6	6	7	6	5	1	3	5	4	3	2	4
Elav-Gal4>UAS-hTauV337M; ∆Pfdn515/40	30	32	40	33	33	30	31	8	6	15	10	10	8	12	6	4	5	2	4	4	3
