# Supplementary material for: Prefoldin 5 is a microtubule-associated protein that suppresses Tau aggregation and neurotoxicity
Source: eLife. 2026 Jan 14;13:RP104691. doi: 10.7554/eLife.104691 (PMC12803513; doi:10.7554/eLife.104691)
Supplement: Figure 5—source data 1. [file elife-104691-fig5-data1.xlsx]

## Sheet: Figure 5F
Elav-Gal4>UAS-hTauV337M	Elav-Gal4>UAS-hTauV337M; ∆Pfdn515/40	Elav-Gal4>UAS-hTauV337M; UAS-Pfdn5; ∆Pfdn515/40
3	6	0
1	11	0
1	19	0
2	6	1
0	17	0
2	4	0
0
0

## Sheet: Figure 5K
Elav-Gal4>UAS-hTauV337M	Elav-Gal4>UAS-hTauV337M; ∆Pfdn515/40	Elav-Gal4>UAS-hTauV337M; UAS-Pfdn5; ∆Pfdn515/40
0.00366436	3.48858	0.481738
0.00306924	3.57717	0
0	1.95107	0
0	1.62324	0
0.00359354	1.86993	1.32899
0.00288102	1.68792	0
0.00989036	4.07881	0
0.00645405	1.5644	1.0217
0	1.19385	0
0.366436	1.38783	0
0.306925	1.80633	2.34188
0	2.5671	0
0	1.33764	0.0943045
0.359354	5.02929	0
0.288102	1.25824	0
0.989037	7.55847	0
0.645404	6.60546	0
0	2.79307	0.213454
0	1.13115	0
0	5.84478	0
0.445114	3.88963	0.31099
0.161907		1.37011
0		0.511488
0		0
0		0
0.419247		0
0
0
0
0
0.854951
0.215397
0.50866
0
0
3.49127
0

## Sheet: Figure 5L
Elav-Gal4>UAS-hTauV337M	Elav-Gal4>UAS-hTauV337M; ∆Pfdn515/40	Elav-Gal4>UAS-hTauV337M; UAS-Pfdn5; ∆Pfdn515/40
0.846547	0.26011	0.558827
0.566642	0.283927	0.406514
0.487384	0.194898	0.339827
0.601384	0.21219	0.279414
0.466906	0.153901	0.203257
0.497246	0.186807	0.169914
0.460483	0.189619	0.269751
0.70421	0.271672	0.244206
0.458444	0.415868	0.148342
0.483698	0.225804	0.66167
0.649917	0.355865	0.555125
0.513219	0.270696	0.990737
0.70077	0.264303	0.507996
0.501895	0.446455	0.570552
0.589621	0.29158	0.702691
0.688565	0.275935	0.429065
0.558648	0.218532	0.407354
0.563639	0.191688	0.395444
0.830907	0.270971	0.686331
0.74615	0.248045	0.49621
0.579966	0.368593	0.394142
0.586475		0.853832
0.489948		0.383121
0.51466
