# Supplementary material for: Prefoldin 5 is a microtubule-associated protein that suppresses Tau aggregation and neurotoxicity
Source: eLife. 2026 Jan 14;13:RP104691. doi: 10.7554/eLife.104691 (PMC12803513; doi:10.7554/eLife.104691)
Supplement: Figure 6—figure supplement 1—source data 1. [file elife-104691-fig6-figsupp1-data1.xlsx]

## Sheet: H
	GMR-Gal4>UAS-hTauV337M							GMR-Gal4>UAS-hTauV337M; UAS-Pfdn5							GMR-Gal4>UAS-hTauV337M; UAS-Pfdn6
7	11.9593	12.5	11.2676	10.8932	13.5392	13.382	12.5348	13.5747	8.15603	5.05902	5.72451	9.11111	9.92509	11.9734	8.16327	5.59441	7.30689	7.94979	12.1277	8.16327	5.59441	7.30689	7.94979	12.1277
14	15.3086	15.674	15.7593	14.4737	15.6479	18.3206	16.8539	8.45865	4.03361	4.75382	6.80628	3.9604	11.4537	5.55556	8.11359	8.71287	7.9922	4.75352	8.26271	5.62613	2.85235	8.63158	8.11359	8.71287
30	20.1887	34.9241	23.0068	18.0723	13.1579	28.7197	23.0971	2.74725	4.7619	3.4	2.81955	1.47059	3.3389	2.29682	2.37718	1.07362	3.43137	1.2844	6.75422	2.79605	2.22222	6.45161	3.0853	0.31348

## Sheet: I
	GMR-Gal4>UAS-hTauV337M							GMR-Gal4>UAS-hTauV337M; UAS-Pfdn5								GMR-Gal4>UAS-hTauV337M; UAS-Pfdn6
7	37.7972	43.412	27.3114	36.1031	41.9132	36.9884	36.3915	28.0802	24.1736	27.2547	37.4733	40.8302	3.04153	8.04902	26.8611	47.994	13.0693	25.9221	22.195	14.392	25.3048	9.38769	6.6911
14	47.6369	58.8293	46.5135	42.5898	40.1141	42.0876	51.4033	0.53339	0.53339	1.68678	10.0495	11.9154	5.86493	21.2027	10.0742	26.2229	21.8059	12.6712	15.983	13.2692	47.994	13.0693	25.9221
30	39.778	70.039	53.0962	68.997	56.1762	85.0864	77.7023	7.52347	5.37928	3.2934	2.07125	11.127	6.84359	6.18642	11.8284	4.49246	4.44179	4.9003	3.68794	0.410134	17.5609	5.47971	0.437149
