# Supplementary material for: Prefoldin 5 is a microtubule-associated protein that suppresses Tau aggregation and neurotoxicity
Source: eLife. 2026 Jan 14;13:RP104691. doi: 10.7554/eLife.104691 (PMC12803513; doi:10.7554/eLife.104691)
Supplement: Figure 6—figure supplement 2—source data 1. [file elife-104691-fig6-figsupp2-data1.xlsx]

## Sheet: E
GMR-Gal4>UAS-hTauV337M	GMR-Gal4>UAS-hTauV337M; UAS-Pfdn5	GMR-Gal4>UAS-hTauR406W	GMR-Gal4>UAS-hTauR406W; UAS-Pfdn5
44.8332	36.4777	72.1742	53.3184
43.4669	33.6545	77.3246	66.8854
54.9941	27.996	85.7135	69.1132
34.8107	23.4577	86.0884	63.1056
37.249	24.461	89.4309
40.7894	29.0148
40.5963	31.0502
46.1738	31.316
43.588	22.7414
39.9674	35.1515
43.6256	32.3489
	42.5346
	20.2028

## Sheet: K
Elav-Gal4/+	Elav-Gal4>UAS-hTauWT	Elav-Gal4>UAS-hTauWT; UAS-Pfdn5	Elav-Gal4>UAS-hTauV337M	Elav-Gal4>UAS-hTauV337M; UAS-Pfdn5
27	22	23	23	22
24	32	18	28	23
34	25	24	19	30
35	26	20	26	30
31	43	19	30	36
26	29	18	19	41
19	27	34	30
25	25	39	43
	21		22
	22		25

## Sheet: L
Elav-Gal4/+	Elav-Gal4>UAS-hTauWT	Elav-Gal4>UAS-hTauWT; UAS-Pfdn5	Elav-Gal4>UAS-hTauV337M	Elav-Gal4>UAS-hTauV337M; UAS-Pfdn5
3.7037	37.5	8.69565	21.7391	0
12.5	28	0	21.4286	4.34783
8.82353	26.9231	4.16667	26.3158	0
5.71429	41.8605	0	38.4615	6.66667
9.67742	44.8276	36.8421	26.3158	0
0	22.2222	11.1111	23.2558	2.43902
5.26316	32	0	36.3636
0	23.8095	2.5641	48
	22.7273		25
