# Supplementary material for: Prefoldin 5 is a microtubule-associated protein that suppresses Tau aggregation and neurotoxicity
Source: eLife. 2026 Jan 14;13:RP104691. doi: 10.7554/eLife.104691 (PMC12803513; doi:10.7554/eLife.104691)
Supplement: Figure 6—figure supplement 3—source data 1. [file elife-104691-fig6-figsupp3-data1.xlsx]

## Sheet: I
Elav-Gal4/+	Elav-Gal4>UAS-hTauV337M	Elav-Gal4>UAS-hTauV337M; UAS-GFP	Elav-Gal4>UAS-hTauV337M; UAS-Pfdn5	Elav-Gal4>UAS-hTauV337M; UAS-Pfdn6
0	7	4	1	0
0	6	4	0	1
0	4	2	0	0
0	0	2	0	2
0	4	3	2	0
0	4	1	0	1
0	5	7	0	0
		1	0	0
		5	0	0

## Sheet: J
Elav-Gal4/+	Elav-Gal4>UAS-hTauV337M	Elav-Gal4>UAS-hTauV337M; UAS-GFP	Elav-Gal4>UAS-hTauV337M; UAS-Pfdn5	Elav-Gal4>UAS-hTauV337M; UAS-Pfdn6
0	15.604	24.642	2.6264	0
0	11.8188	33.5256	0	2.8582
0	16.9946	6.257	0	1.6222
0	0	2.8582	0	10.7374
0	11.9734	4.7122	4.326	0
0	10.4284	4.9438	0	8.0338
0	19.6982	7.4158	0	0
		4.6348	0	0
		13.5184	0	0
