# Supplementary material for: Prefoldin 5 is a microtubule-associated protein that suppresses Tau aggregation and neurotoxicity
Source: eLife. 2026 Jan 14;13:RP104691. doi: 10.7554/eLife.104691 (PMC12803513; doi:10.7554/eLife.104691)
Supplement: Figure 6—source data 1. [file elife-104691-fig6-data1.xlsx]

## Sheet: Figure 6E
GMR-Gal4/+	GMR-Gal4>UAS-hTauV337M	GMR-Gal4>UAS-hTauV337M; UAS-Pfdn5	GMR-Gal4>UAS-hTauV337M; UAS-Pfdn6
0	20.1887	5.24535	3.32168
0	34.9241	3.52734	2.37718
0	23.0068	2.54669	1.07362
0	18.0723	2.74725	3.43137
0	13.1579	4.7619	1.2844
0	28.7197	3.4	6.75422
0	23.0971	2.81955	2.79605
0	18.1572	1.47059	2.22222
0	34.2308	3.3389	6.45161
0	24.2775	2.29682	3.0853
0	21.447	2.14669	0.31348
0	27.8932	1.31086	0.324149
	43.9462	3.16901
	46.4115
	35.4244
	26.1538
	44.1315
	40.836

## Sheet: Figure 6F
GMR-Gal4/+	GMR-Gal4>UAS-hTauV337M	GMR-Gal4>UAS-hTauV337M; UAS-Pfdn5	GMR-Gal4>UAS-hTauV337M; UAS-Pfdn6
0	39.778	7.52347	4.49246
0	70.039	5.37928	4.44179
0	53.0962	3.2934	4.9003
0	68.997	2.07125	3.68794
0	56.1762	11.127	0.410134
0	85.0864	6.84359	17.5609
0	77.7023	6.18642	5.47971
0	66.0838	11.8284	0.437149
0	88.8752	2.32598	1.82263
0	71.6146	0.703049	1.92988
0	65.7246	3.85111	0.1449
0	68.7623	2.71894	0.651158
	80.8923	5.07466
	88.8384
	73.477
	64.3196
	83.1678
	74.6269

## Sheet: Figure 6M
Elav-Gal4/+	Elav-Gal4>UAS-hTauV337M	Elav-Gal4>UAS-hTauV337M; UAS-GFP	Elav-Gal4>UAS-hTauV337M; UAS-Pfdn5	Elav-Gal4>UAS-hTauV337M; UAS-Pfdn6
10	43	41	8	8
6	52	46	10	3
9	67	62	8	4
7	82	89	9	2
7	104	65	3	4
5	103	64	7	13
6			10
7

## Sheet: Figure 6N
Elav-Gal4/+	Elav-Gal4>UAS-hTauV337M	Elav-Gal4>UAS-hTauV337M; UAS-GFP	Elav-Gal4>UAS-hTauV337M; UAS-Pfdn5	Elav-Gal4>UAS-hTauV337M; UAS-Pfdn6
4.3936	68.0166	48.222	12.8232	8.8546
5.6003	30.3004	49.3612	6.7398	1.7671
9.1473	19.8912	42.0034	9.4135	5.977
7.1745	82.1722	31.7294	2.8389	4.0748
6.4406	49.902	64.5212	1.0332	3.0512
2.6651			4.8956	2.4332
			9.5594

## Sheet: Figure 6P
Elav-Gal4>UAS-hTauV337M	Elav-Gal4>UAS-hTauV337M; UAS-GFP	Elav-Gal4>UAS-hTauV337M; UAS-Pfdn5	Elav-Gal4>UAS-hTauV337M; UAS-Pfdn6
1	1.01593	1.23757	1.16663
1	0.876726	0.885566	0.916969
1	1.05576	1.08803	1.19718
