# Supplementary material for: Prefoldin 5 is a microtubule-associated protein that suppresses Tau aggregation and neurotoxicity
Source: eLife. 2026 Jan 14;13:RP104691. doi: 10.7554/eLife.104691 (PMC12803513; doi:10.7554/eLife.104691)
Supplement: Figure 7—source data 1. [file elife-104691-fig7-data1.xlsx]

## Sheet: Figure 7B
C	T
28.0533	19.3456
34.589	10.177
20.7136	15.8187
29.2116	15.648
23.341	9.49561
23.2582	5.80859
15.6204	4.42553
14.5262	2.49114

## Sheet: Figure 7C
C	T
39.4815	13.4854
37.7434	40.1829
38.0514	47.7941
28.6701	44.5081
14.5195	22.716
24.8749	19.1522
28.2282	26.7426
15.5344	18.4397

## Sheet: Figure 7D
C	T
16.359	-4.2839
11.803	-6.9592
24.615	10.335
26.741	4.7429
9.4778	-7.0996
23.883	-17.366
25.31	-1.1965
7.9716	-13.634

## Sheet: Figure 7E
C	T
29.6835	24.6491
7.6806	-24.1186
27.19	-4.38801
26.8308	-5.46192
15.1536	0.888533
5.97523	-2.9116
19.6883	3.36626
14.7638	0.912976

## Sheet: Figure 7F
C	T
17.791	-4.55988
5.19737	-9.40916
22.283	6.17219
16.3274	-1.93602
17.9127	2.82107
14.9903	-0.90909
10.0085	-4.5226
9.71048	0.174256

## Sheet: Figure 7G
C	T
35.7761	10.6636
21.6119	3.57143
47.6776	30.2124
14.8192	0.157488
16.2613	-0.17999
2.72912	-17.0192
18.4984	-21.4912
7.72915	-6.43715
21.4613	-4.19483

## Sheet: Figure 7N
	Elav-Gal4/+	Elav-Gal4>UAS-hTauV337M	Elav-Gal4>UAS-hTauV337M; UAS-GFP	Elav-Gal4>UAS-hTauV337M; UAS-Pfdn5	Elav-Gal4>UAS-hTauV337M; UAS-Pfdn6
Ist time	0	83.3333	87.5	0	12.5
II time	0	100	100	0	25

## Sheet: Figure 7O
	Normal MB	Grade I	Grade II
Elav-Gal4/+	100	0	0
Elav-Gal4>UAS-hTauV337M	11.1	22.2	66.7
Elav-Gal4>UAS-hTauV337M; UAS-Pfdn5	100	0	0
Elav-Gal4>UAS-hTauV337M; UAS-Pfdn6	83.3	16.6	0
