# Supplementary material for: Prefoldin 5 is a microtubule-associated protein that suppresses Tau aggregation and neurotoxicity
Source: eLife. 2026 Jan 14;13:RP104691. doi: 10.7554/eLife.104691 (PMC12803513; doi:10.7554/eLife.104691)
Supplement: Figure 8—figure supplement 1—source data 1. [file elife-104691-fig8-figsupp1-data1.xlsx]

## Sheet: B
w1118	∆Pfdn515/40	Elav-Gal4>UAS-α-Tubulin; ∆Pfdn515/40	Elav-Gal4>UAS-Pfdn5; ∆Pfdn515/40
1	0.229303	0.435826	1.12403
1	0.286796	0.968154	1.04445
1	0.159709	0.846233	0.97854

## Sheet: C
w1118	∆Pfdn515/40	Elav-Gal4>UAS-α-Tubulin; ∆Pfdn515/40	Elav-Gal4>UAS-Pfdn5; ∆Pfdn515/40
1	0.129207	1.39232	1.03664
1	0.415068	0.611298	0.991853
1	0.25744	1.0874	1.01234

## Sheet: D
w1118	∆Pfdn515/40	Elav-Gal4>UAS-α-Tubulin; ∆Pfdn515/40	Elav-Gal4>UAS-Pfdn5; ∆Pfdn515/40
1	0.194468	1.6186	1.22103
1	0.587128	1.41875	1.19217
1	0.227957	1.10596	2.42015

## Sheet: I
Elav-Gal4/+	∆Pfdn515/40	Elav-Gal4>UAS-α-Tubulin; ∆Pfdn515/40	Elav-Gal4>UAS-Pfdn5; ∆Pfdn515/40
3	10	13	4
2	22	13	3
0	13	14	5
2	17	9	2
2	20	20	3
1	15	11	3
4	16	20	2
1	11	14	3

## Sheet: k
Tau-Pfdn5
0.59
0.515
0.5
0.435
0.513
0.734
0.493
