# Supplementary material for: Prefoldin 5 is a microtubule-associated protein that suppresses Tau aggregation and neurotoxicity
Source: eLife. 2026 Jan 14;13:RP104691. doi: 10.7554/eLife.104691 (PMC12803513; doi:10.7554/eLife.104691)
Supplement: Figure 8—source data 1. [file elife-104691-fig8-data1.xlsx]

## Sheet: Figure 8E
w1118	∆Pfdn515/40	Elav-Gal4>UAS-α-Tubulin; ∆Pfdn515/40
0.469679	0.195312	0.256616
0.566364	0.139695	0.239615
0.396669	0.232909	0.174599
0.466465	0.135762	0.222307
0.55039	0.184257	0.256382
0.375882	0.186174	0.231058

## Sheet: Figure 8I
Elav-Gal4>UAS-hTauV337M	Elav-Gal4>UAS-hTauV337M; ∆Pfdn515/40	Elav-Gal4>UAS-hTauV337M; UAS-α-Tubulin; ∆Pfdn515/40
0.11105	1.62324	5.12689
0.136355	1.86993	1.28257
0	1.68792	7.66906
0.181068	4.07881	1.78711
0	1.5644	2.21371
0.172108	1.19385	2.10806
0.272806	7.55847	1.42077
0.526592	6.60546	1.57138
0	2.79307	2.02046
0.54112	1.13115	4.39892
0.161907	5.84478	1.48242
0	3.88963	3.67991
